# Supplementary material
Source: PubMed Central journal article supplement (PMC8201828)
Supplement: pnas.2024067118.sapp.pdf [file pnas.2024067118.sapp.pdf]

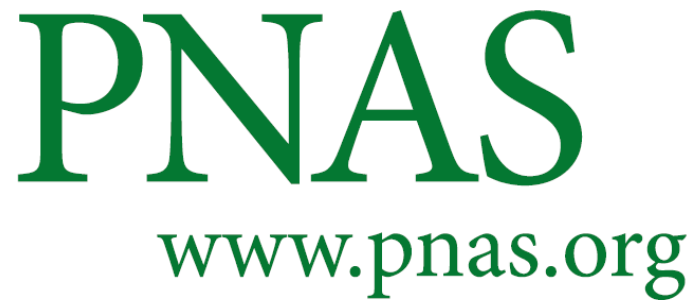

## **Supplementary Information for**

### **Sexual fate of murine external genitalia development: conserved transcriptional competency for male-biased genes in both sexes.**

#### **Authors;**

Daiki Kajioaka<sup>1†</sup>, Kentaro Suzuki<sup>1†\*</sup>, Shoko Matsushita<sup>1</sup>, Shinjiro Hino<sup>2</sup>, Tetsuya Sato<sup>3</sup>, Shuji Takada<sup>4</sup>, Kyoichi Isono<sup>5</sup>, Toru Takeo<sup>6</sup>, Mizuki Kajimoto<sup>1</sup>, Naomi Nakagata<sup>7</sup>, Mitsuyoshi Nakao<sup>2</sup>, Mikita Suyama<sup>3</sup>, Tony DeFalco<sup>8</sup>, Shinichi Miyagawa<sup>9</sup> and Gen Yamada<sup>1\*</sup>

\* Correspondence: Gen Yamada, Ph.D., Kentaro Suzuki, Ph.D. Department of Developmental Genetics, Institute of Advanced Medicine, Wakayama Medical University, 811-1 Kimiidera, Wakayama 641-8509, Japan.

Email: transg8@wakayama-med.ac.jp (Y.G.), genyama778899@gmail.com (Y.G.), k-suzuki@wakayama-med.ac.jp (K.S.)

#### **This PDF file includes:**

Figures S1 to S5

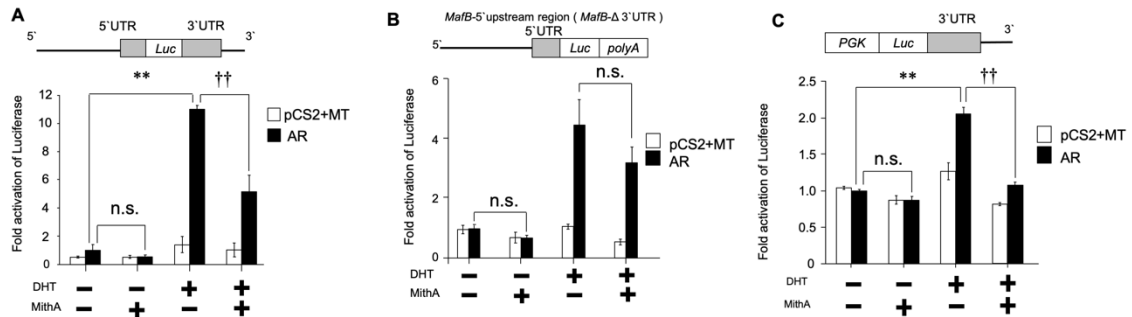

**Fig. S1. Inhibition of Sp1 reduces AR regulatory *MafB* expression through its enhancer.**

(A-C) Reporter vectors for luciferase assays were constructed as described in our previous report. Six hours after transfecting plasmid vectors in HepG2 cells, 100nM MithA was pretreated for 24 hours. (A) 100nM MithA inhibited DHT-AR induced luciferase reporter activity. (B, C) Effect of 100nM MithA on luciferase activity of *MafB*-5' upstream region and pmirGLO-*MafB*-3' UTR reporter assays. Three-nine independent biological replicates were performed. \*\*  $p < 0.01$ , ††  $p < 0.01$ , n.s. (not significant,  $p > 0.05$ ).

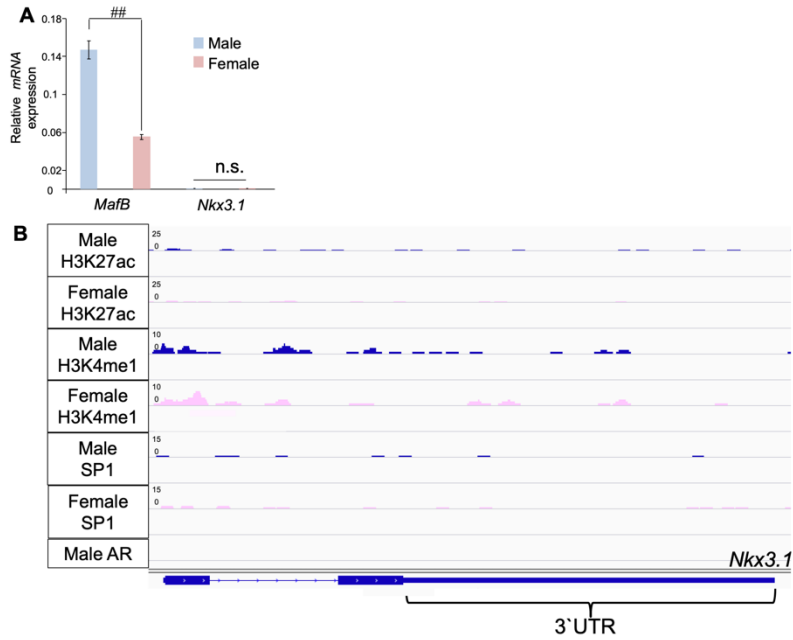

**Fig. S2. *Nkx3.1* is not an androgen-regulated sex-biased gene in the eExG.**

(A) Quantitative PCR of mRNA extracted from eExG urethral bilateral regions was performed to detect the expression levels of *MafB* and *Nkx3.1* normalized to levels of *Gapdh*. Three-five independent biological replicates were performed. ##  $p < 0.01$ , n.s. (not significant,  $p > 0.05$ ). (B) Integrated Genomics Viewer (IGV) screenshot of ChIP-seq genomic tracks at the *Nkx3.1* gene locus. Active histone modifications, SP1, and AR were not detected in the eExG of both sexes.

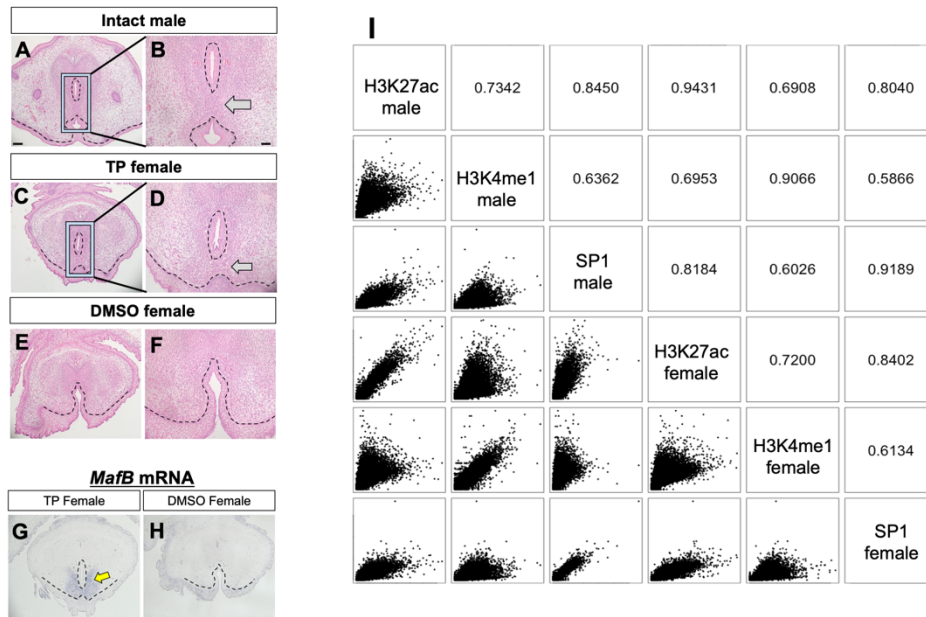

**Fig. S3. Exogenous androgen induces male-type urethral differentiation in females.**

(A-F) H&E staining for intact male eExG, TP- and DMSO-treated female eExG at E16.5. Gray arrows show male-type urethral differentiation. TP, testosterone propionate. (G, H) Section in situ hybridization for *MafB* mRNA for TP- and DMSO-treated female E16.5 eExG. Yellow arrow represents male-type urethral differentiation associated with *MafB* expression. Administration of TP or DMSO was started at E15.5 and embryos were harvested at E16.5. (I) Coefficient plots show that SP1 binding events were highly positively correlated with the presence of H3K27ac at AR-mediated regulatory elements. Dashed lines, epithelial-mesenchymal border. Scale bar in A, C, E, G, H = 100 $\mu$ m, Scale bar in B, D, F = 50 $\mu$ m.

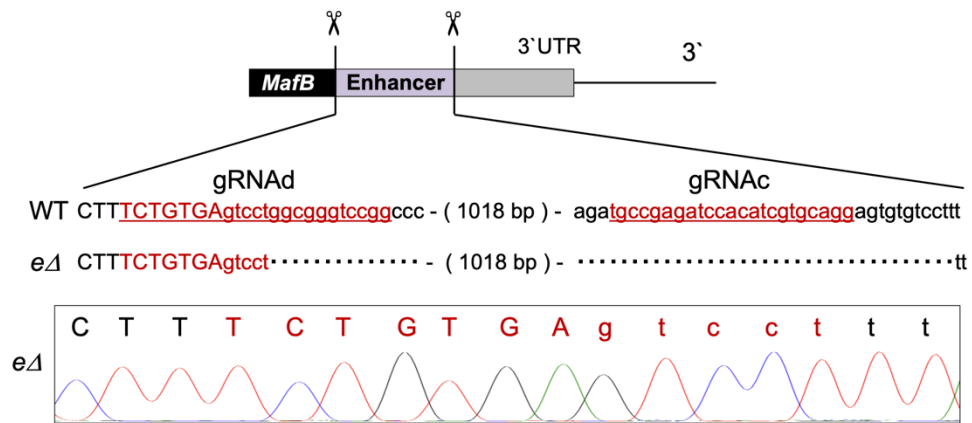

**Fig. S4. Generation of *MafB* enhancer deletion mouse by the CRISPR-Cas9 genome editing system.**

Track shows results of direct sequencing from *MafB* enhancer mutant mouse line. Red characters indicate target sequences by gRNAs. Large characters indicate coding sequences.

**FOXA1 / Hoechst**

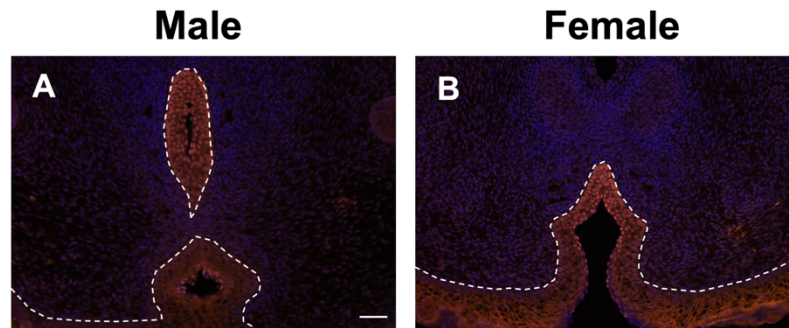

**Fig. S5. Expression of FOXA1 in male and female eExG at E16.5.**

(A, B) FOXA1 was predominantly expressed in the eExG endodermal epithelium. Scale bar, 50 $\mu$ m. Dashed lines, epithelial-mesenchymal border.
